# Supplementary material for: Xp11.22 deletions encompassing CENPVL1, CENPVL2, MAGED1 and GSPT2 as a cause of syndromic X-linked intellectual disability
Source: PubMed Central journal article supplement (PMC5393878; doi:10.1371/journal.pone.0175962), 2017-04-17
Supplement: pone.0175962.s001.pdf [file pone.0175962.s001.pdf]

**Table S1: PCR confirmation and fine mapping of the Xp11.22 deletion of subject 1**

| Interval Amplified (hg19)  | Primer Pair Name                    | Primer Pair (Forward/Reverse)                                     | Amplicon Size (Base Pairs) | Amplified from subject 1? |
|----------------------------|-------------------------------------|-------------------------------------------------------------------|----------------------------|---------------------------|
| chrX:50,729,647-50,729,848 | Sub 1 Xp11.22 5' pos control        | 5'-AAGAACAACACTGCTGGAACCTTTGG-3'<br>5'-TGCAGCCTTTGTGTTAATGCT-3'   | 201                        | Yes                       |
| chrX:50,743,151-50,743,384 | Sub1 Xp11.22 5' A                   | 5'-ACAATGTAGGCTTTAGCACAACA-3'<br>5'-GGTGATGCATTGCTAGCATGT-3'      | 233                        | Yes                       |
| chrX:50,767,670-50,767,871 | Sub 1 Xp11.22 5' B                  | 5'-GGAACCTTCCTGCTGAACTAGAG-3'<br>5'-TTATGGATATTGAAATGCAGTGAGGA-3' | 201                        | Yes                       |
| chrX:50,789,502-50,789,911 | Sub 1 xp11.22 5' C                  | 5'-TCAGCTGAGACCCTATGCCT-3'<br>5'-TGGGACAACAATTGCTATTTGTAGA-3'     | 410                        | Yes                       |
| chrX:50,846,687-50,847,688 | Sub 1 Xp11.22 5' min neg control 5' | 5'-CATCATTACCCCTGCTGTGC-3'<br>5'-GATGCACTCATCCCCACTCA-3'          | 101                        | No                        |
| chrX:51,731,836-51,731,951 | Sub 1 Xp11.22 3' min neg control 3' | 5'-ACTGCTCAGCGTTAGGGAAG-3'<br>5'-TGCCCACCTTTGACACCAAT-3'          | 115                        | No                        |
| chrX:51,773,705-51,773,907 | Sub 1 Xp11.22 3' A                  | 5'-GCCCCAAACTCTCCAGTTCT-3'<br>5'-CCTCTCATCAACAAACGTTCAACC-3'      | 202                        | No                        |
| chrX:51,786,912-51,787,145 | Sub 1 Xp11.22 3' B                  | 5'-CCCCAGCAAGCCTTTCCTT-3'<br>5'-AGGCGCACAAAATATTTCCGA-3'          | 233                        | Yes                       |
| chrX:51,805,406-51,805,640 | Sub 1 Xp11.22 3' pos control        | 5'-CATCTAGGACGCTGGTGCTG-3'<br>5'-ATATCGGGGATGAAGCGCTG-3'          | 234                        | Yes                       |
